# Supplementary material for: The pendant drop experiment for aggregates of cohesive granular particles
Source: Royal Society of Chemistry journal article supplement (doi:10.1039/d4sm01424c), 2025-01-01
Supplement: d4sm01424c1.pdf [file d4sm01424c1.pdf]

All videos are in real time.

For all videos:  $C_m = 173$  mM

Video A: Formation of a cluster.

$$R = 70 \text{ }\mu\text{m}$$

$$r_d = 9.4 \text{ }\mu\text{m}$$

Video B: Formation of a cluster.

$$R = 93 \text{ }\mu\text{m}$$

$$r_d = 10.2 \text{ }\mu\text{m}$$

Video C: Formation of a satellite cluster. (Same cluster shown in Fig. 3 on manuscript)

$$R = 93 \text{ }\mu\text{m}$$

$$r_d = 4.9 \text{ }\mu\text{m}$$
